# Supplementary material for: A named entity recognition model embedding rehabilitation medicine Chinese character knowledge graph
Source: PeerJ journal article supplement (doi:10.7717/peerj-cs.3176), 2025-10-23
Supplement: Dataset_Information.docx [file Dataset_Information.docx]

We would like to clarify and update the dataset links provided in our submission to ensure reproducibility and long-term accessibility. The revisions address concerns about potential data volatility in the original repositories:

1. **CMeEE Dataset**

Original link: https://tianchi.aliyun.com/dataset/144495

Revised link: https://github.com/CBLUEbenchmark/CBLUE

Reason: The Tianchi platform is not designed for permanent archival, as data files may be altered or removed post-release. The new GitHub repository guarantees stable access.

Dataset Information:​

1. Dataset Provider​​

Key Laboratory of Computational Linguistics (Ministry of Education), Peking University, Beijing 100871, China.

Natural Language Processing Laboratory, Zhengzhou University, Zhengzhou 450001, Henan, China.

Smart Healthcare Research Group, Artificial Intelligence Research Center, Pengcheng Laboratory, Shenzhen 518052, Guangdong, China.

Harbin Institute of Technology, Shenzhen 518000, Guangdong, China.

1. Dataset Managers​​

Li Wenxin, Zhengzhou University

Zhang Kunli, Zhengzhou University

Chang Bao, eking University

[https://github.com/jamesXuan/BERT-Span](https://github.com/jamesXuan/BERT-Span" \t "https://mail.qq.com/cgi-bin/_blank)

1. **RMCCKG and Rehab Dataset :**

Original repository: https://github.com/jamesXuan/BERT-Span

Revised repository：

https://github.com/AaabbB-quick/A-Named-Entity-Recognition-model-embedding-rehabilitation-medicine-Chinese-character-knowledge-graph

Data archival: All associated datasets are now permanently hosted on figshare with the DOI:

10.6084/m9.figshare.29466521.

These updates ensure persistent availability through GitHub (code) and figshare (data), aligning with best practices for reproducible research.
